# Supplementary material for: Ciprofloxacin Uptake from an Aqueous Solution via Adsorption with K2CO3-Activated Biochar Derived from Brewing Industry Bagasse
Source: MDPI journal article supplement (doi:10.3390/pr12010199), 2024-01-17
Supplement: s1 [file s1]

## Supplementary Information

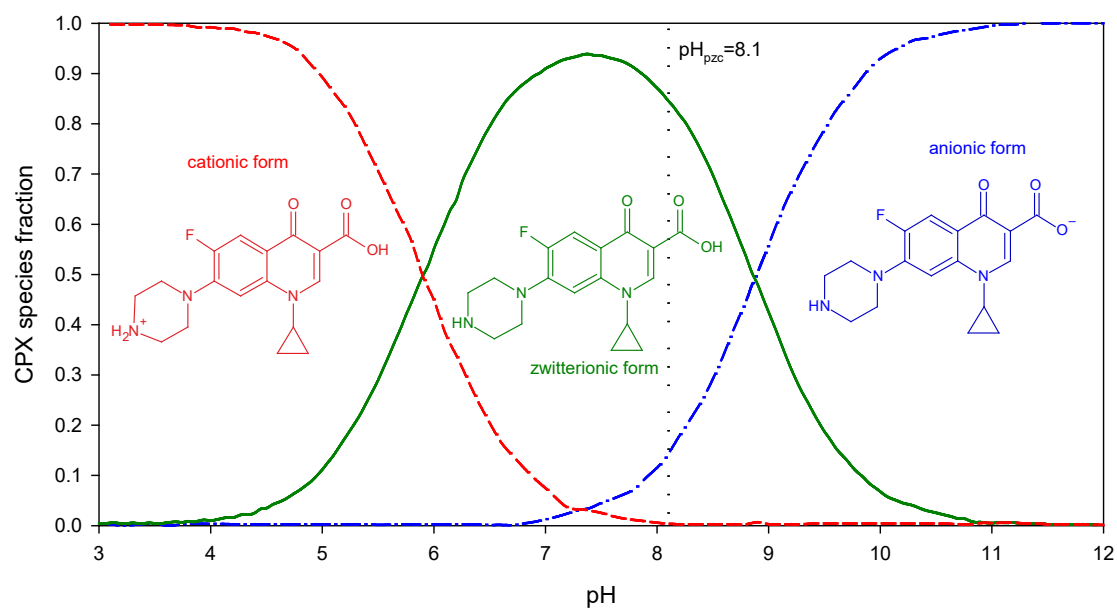

**Figure S1.** CPX speciation as a function of pH and  $pH_{pzc}$  of  $K_2CO_3$  activated biochar

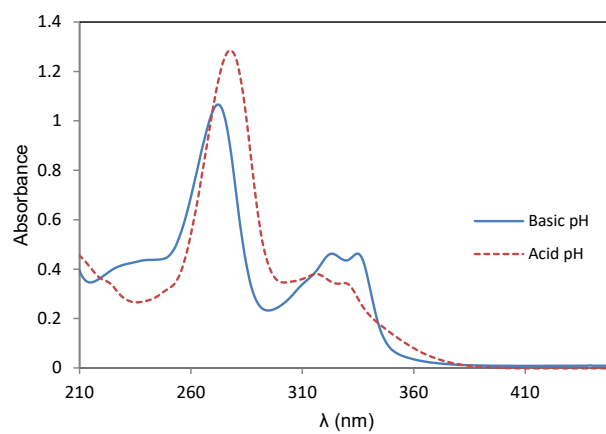

**Figure S2.** Absorption spectra of CPX solutions ( $10 \text{ mg} \cdot \text{L}^{-1}$ ) at acid or basic pH
